# Supplementary material for: High-molecular-weight polymers from dietary fiber drive aggregation of particulates in the murine small intestine
Source: bioRxiv or medRxiv preprint supplement (doi:10.1101/490920), 2018-12-10
Supplement: Supplementary file [file media-1.pdf]

110 Supplementary Information for:

111  
112 High-molecular-weight polymers from dietary fiber drive  
113 aggregation of particulates in the murine small intestine  
114

115 Asher Preska Steinberg, Sujit S. Datta, Thomas Naragon, Justin C. Rolando, Said R. Bogatyrev, Rustem F. Ismagilov  
116

117  
118 **Figure 1 – figure supplement 1, Figure 4 – figure supplements 1-3, Figure 5 – figure supplement 1, Figure 6 –**  
119 **figure supplements 1-3**

120 **Tables 1 – 8**  
121

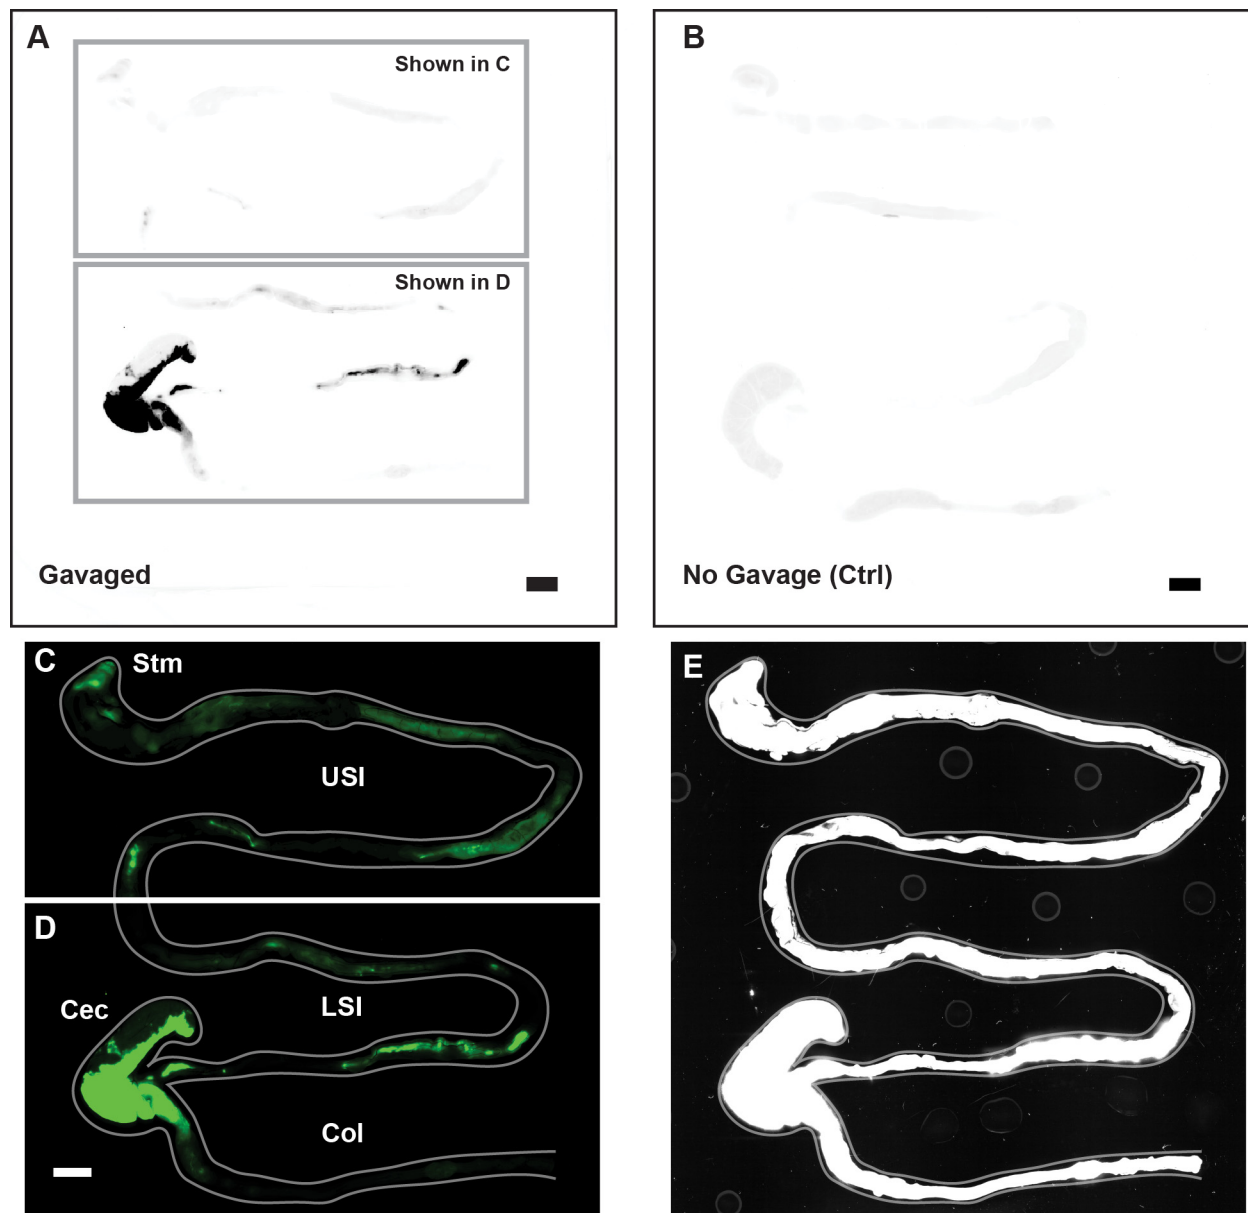

122

123 **Figure 1 – figure supplement 1.** Overview of image processing for fluorescent scanner images appearing in Figure 1. (A)  
 124 Unmodified fluorescent scanner images of the gastrointestinal tract of a mouse gavaged with 1  $\mu$ m-diameter PEG-coated  
 125 particles (prior to the contrast and color-adjustments shown in Fig. 1A–B). Scale bar is 0.5 cm. Boxes indicate the regions  
 126 that are shown in panels C and D. (B) Unmodified fluorescent scanner image of the gut of a mouse that has not been  
 127 gavaged with particles. Scale bar is 0.5 cm. (C and D). The contrast and color-adjusted images that appear in Fig. 1A–B.  
 128 (E) Contrast-adjusted image of Figures 1A-B that was used to trace the outline of the gut shown in Fig. 1A–B (and panel  
 129 C and D of this figure). Outline of gut is shown in grey on both C, D, and E.

130

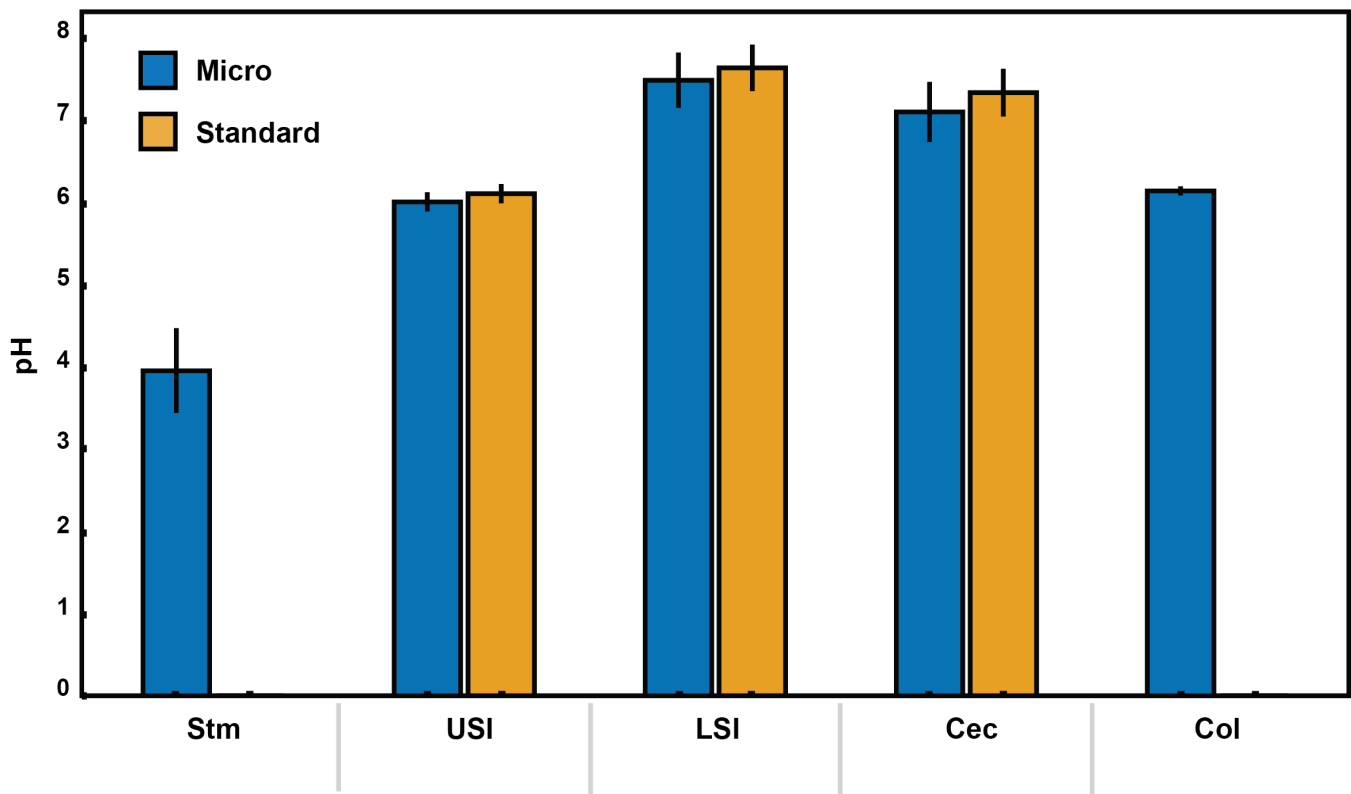

131

132 **Figure 4 – figure supplement 1.** pH measurements of luminal fluid from different sections of the gastrointestinal tract.  
 133 Measurements were conducted on pooled samples of luminal fluid collected from two groups of mice. Each measurement  
 134 was repeated three times, and the error bars are the standard deviation across the six trials (three trials per group). Micro  
 135 (blue) indicates measurements that were conducted using a micro pH electrode. Standard (orange) indicates measurements  
 136 that were conducted using a standard pH electrode. For the stomach and colon samples there was insufficient luminal fluid  
 137 from both groups to submerge the tip of the standard pH electrode, so measurements were only taken with the micro pH  
 138 electrode. Stm = stomach, USI = upper small intestine. LSI = lower small intestine, Cec = cecum, and Col = colon.

139

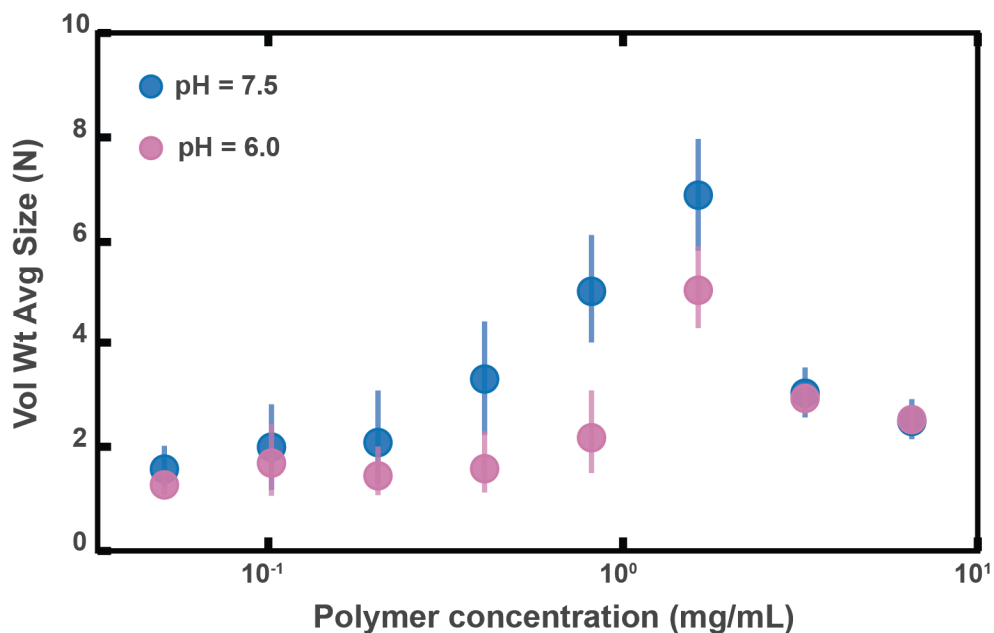

140

141 **Fig. 4 – figure supplement 2. Aggregation of PEG-coated particles in model polymer solutions with different**  
 142 **pH (A)** Volume-weighted average sizes for serial dilutions of 1 MDa PEG solutions in a phosphate buffered  
 143 saline solution with  $pH = 6.0 \pm 0.1$  (labeled pH = 6.0) and in Hank's balanced salt solution (HBSS) with  $pH =$   
 144  $7.6 \pm 0.1$  (same data from Figure 4D). Volume-weighted average sizes are plotted on the vertical axis in terms  
 145 of number of particles per aggregate (N) against polymer mass concentration ( $c_p$ ) in mg/mL. The vertical error  
 146 bars are 95% empirical bootstrap CI (see *Materials and Methods* for bootstrapping procedure).

147

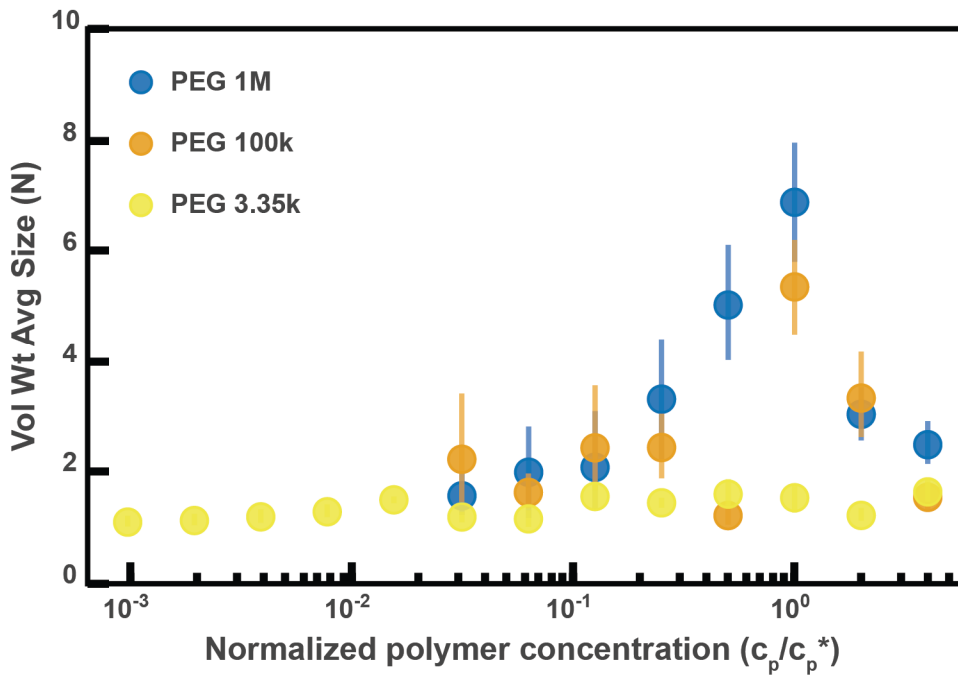

148

149 **Fig. 4 – figure supplement 3. Aggregation of PEG-coated particles in model polymer solutions from Figure**  
 150 **4D normalized by polymer overlap concentration.** Volume-weighted average sizes for serial dilutions of 1  
 151 MDa PEG solutions in Hank’s balanced salt solution (HBSS). Volume-weighted average sizes are plotted on  
 152 the vertical axis in units of number of particles per aggregate (N) against the “normalized polymer  
 153 concentration.” The normalized polymer concentration is the polymer mass concentration ( $c_p$ ) in mg/mL  
 154 divided by the overlap concentration of each polymer solution ( $c_p^*$ ) in mg/mL. The overlap concentrations for  
 155 PEG 1 MDa, 100 kDa, and 3350 Da are  $c_p^* = 1.6, 8.6,$  and  $52.6$  mg/mL, respectively. The vertical error bars are  
 156 95% empirical bootstrap CI (see *Materials and Methods* for bootstrapping procedure).

157

158

159

160

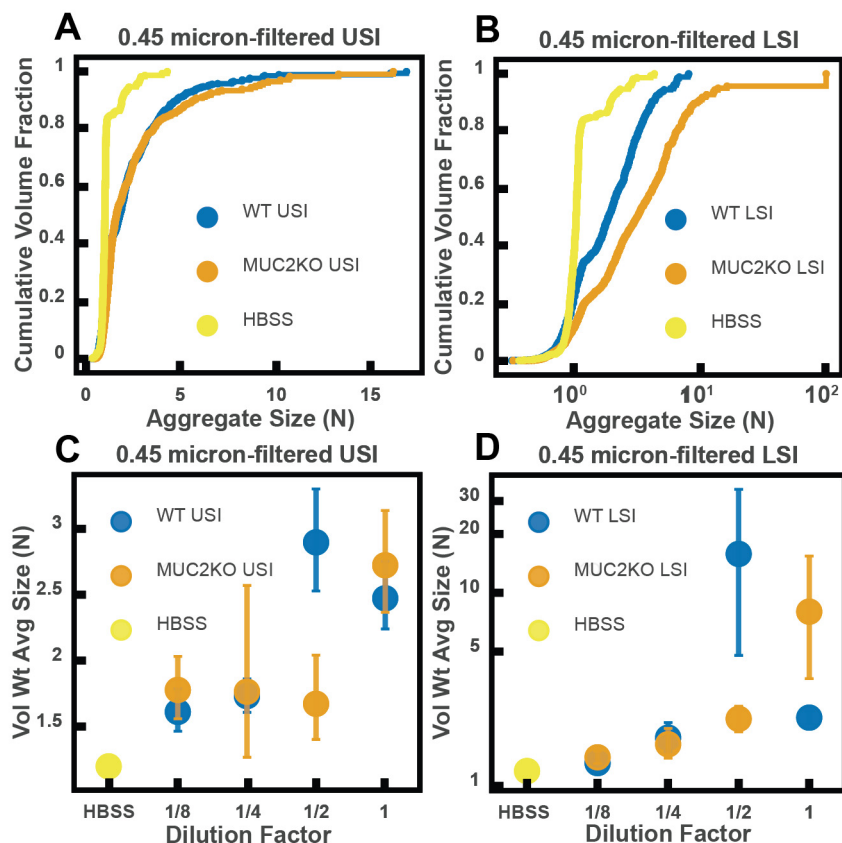

161

162 **Figure 5 – figure supplement 1.** *Ex vivo* aggregation in 0.45  $\mu$ m-filtered luminal fluid from the small intestines (SI) of  
163 wild-type (WT) and MUC2 knockout (MUC2KO) mice. (A and B) Volume-weighted empirical cumulative distribution  
164 functions (ECDFs) comparing aggregation of the particles in undiluted, 0.45- $\mu$ m-filtered samples from the upper (A) and  
165 lower (B) SI of two separate groups of WT and MUC2KO mice to the control (particles suspended in HBSS). The  
166 vertical axis is the cumulative volume fraction of the total number of particles in solution in an aggregate of a given size.  
167 The horizontal axis is aggregate size in number of particles per aggregate (N). (C and D) Volume-weighted average  
168 aggregate sizes (Vol Wt Avg Size) for serial dilutions of 0.45  $\mu$ m-filtered samples from the upper (C) and lower (D) SI of  
169 two separate groups of WT and MUC2KO mice. Volume-weighted average sizes are plotted on the vertical axis in terms  
170 of number of particles per aggregate (N). The dilution factor is plotted on the horizontal axis, where a dilution factor of 1  
171 is undiluted and  $\frac{1}{2}$  is a two-fold dilution. The control (particles suspended in HBSS) is plotted as a dilution factor of 0.  
172 The vertical error bars are 95% empirical bootstrap CI using the bootstrapping procedure described in *Materials and*  
173 *Methods*.

174

175

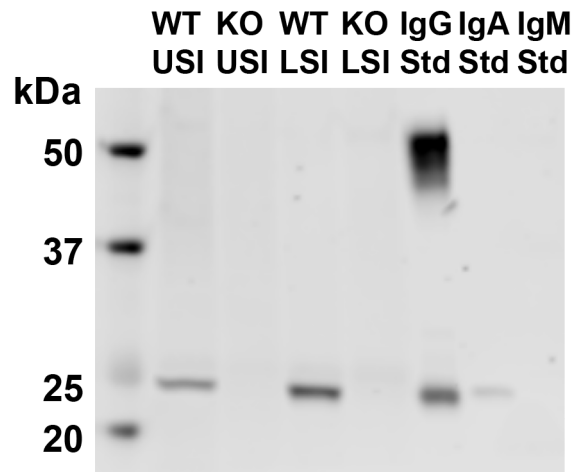

**Figure 6 – figure supplement 1.** Western blots of 30  $\mu\text{m}$ -filtered samples from the small intestine (SI) of wild-type (WT) and Rag1 knockout (Rag1KO) mice. WT USI = WT upper SI; KO USI = KO lower SI; WT LSI = WT lower SI; KO USI = KO upper SI. For the detection of IgG, 1:10,000 dilutions of Li-Cor IRDye 800 CW Goat Anti-Mouse IgG was used. Because the Anti-IgG antibody appears to be binding to just the light chains (around 25 kDa), we suspect that it is mostly binding to IgA. Li-Cor’s published validation ([https://www.licor.com/bio/products/reagents/secondary\\_antibodies/irdye\\_800cw.html](https://www.licor.com/bio/products/reagents/secondary_antibodies/irdye_800cw.html)) found that the antibody binds to the heavy and light chains of IgG and just the light chains of IgA. Because we see binding of the antibody to both the heavy and light chains in the IgG standard, but only binding to a light chain in the SI samples and the IgA control, this suggests that we are detecting the light chains of IgA in the SI samples.

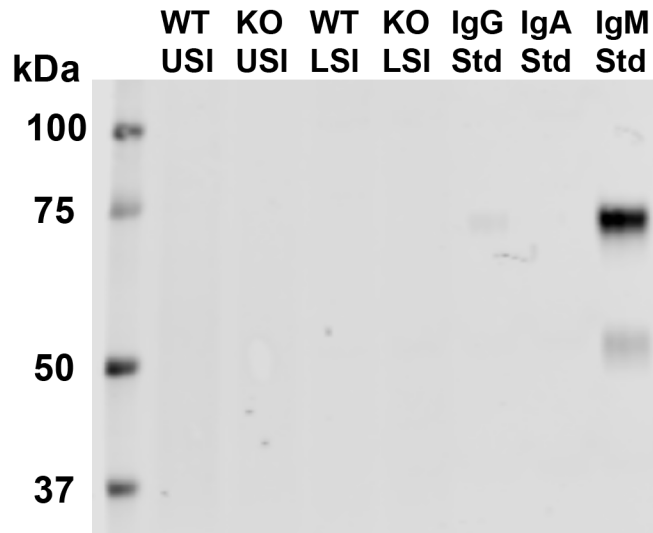

187

188

189

190

191

192

**Figure 6 – figure supplement 2.** Western blots of 30  $\mu$ m-filtered samples from the small intestine (SI) of wild-type (WT) and Rag1 knockout (Rag1KO) mice. WT USI = WT upper SI; KO USI = KO lower SI; WT LSI = WT lower SI; KO USI = KO upper SI. For detection of IgM, 1:10,000 dilution of Li-Cor IRDye 800CW Goat Anti-Mouse IgM was used. We do not detect IgM in any of the SI samples.



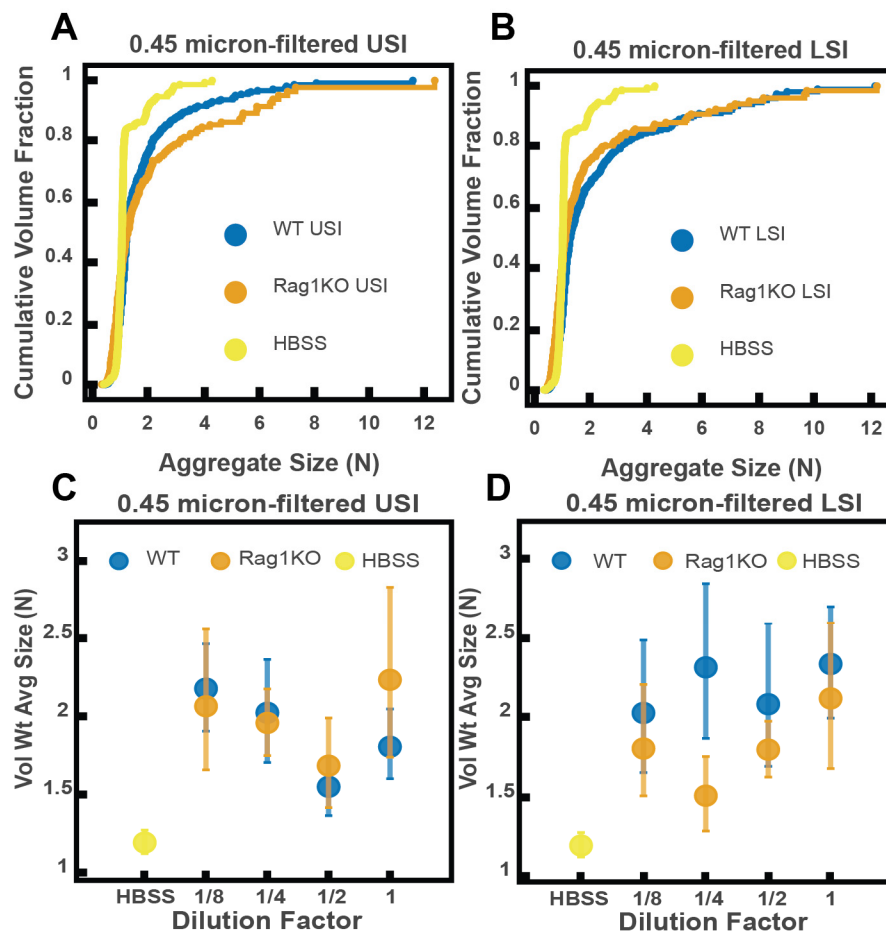

195 **Figure 6 – figure supplement 3.** *Ex vivo* aggregation in 0.45- $\mu$ m-filtered luminal fluid from the small intestines (SI) of  
 196 wild-type (WT) and Rag1 knockout (Rag1KO) mice. (A and B) Volume-weighted empirical cumulative distribution  
 197 functions (ECDFs) comparing aggregation of the particles in undiluted, 0.45- $\mu$ m-filtered samples from the upper (A) and  
 198 lower (B) SI of two separate groups of WT and immunoglobulin-deficient (Rag1KO) mice to the control (particles  
 199 suspended in HBSS). Plotted on the vertical axis is the cumulative volume fraction of the total number of particles in  
 200 solution in an aggregate of a given size. Plotted on the horizontal axis are aggregate sizes in number of particles per  
 201 aggregate (N). (C and D). Volume-weighted average aggregate sizes (Vol Wt Avg Size) for serial dilutions of 0.45- $\mu$ m-  
 202 filtered samples from the upper (C) and lower (D) SI of two separate groups of WT and Rag1KO mice. Volume-weighted  
 203 average sizes are plotted on the vertical axis in terms of number of particles per aggregate (N). The dilution factor is  
 204 plotted on the horizontal axis, where a dilution factor of 1 is undiluted and  $\frac{1}{2}$  is a two-fold dilution. The control (particles  
 205 suspended in HBSS) is plotted as a dilution factor of 0. The vertical error bars are 95% empirical bootstrap CI using the  
 206 bootstrapping procedure described in *Materials and Methods*.

**Table 1. Estimates of physical parameters of polymers from gel permeation chromatography for liquid fractions from the upper small intestine of MUC2 knockout (MUC2KO) and wild-type (WT) mice.**

| Retention volume (mL)              | 11 to 16  |           | 16 to 20 |          | >20       |           |
|------------------------------------|-----------|-----------|----------|----------|-----------|-----------|
|                                    | WT        | MUC2KO    | WT       | MUC2KO   | WT        | MUC2KO    |
| <b>M<sub>w</sub> (kDa)</b>         | 3,560±410 | 5,420±620 | 162±20   | 147±17   | 4.05±0.46 | 2.96±0.34 |
| <b>M<sub>w</sub>/M<sub>n</sub></b> | 1.36      | 1.59      | 2.16     | 2.43     | 3.59      | 10.9      |
| <b>R<sub>h</sub> (nm)</b>          | 49.1      | 45.5      | 6.31     | 5.95     | 1.18      | 1.02      |
| <b>Fract. Conc. (mg/mL)</b>        | 2.52±0.29 | 1.18±0.13 | 24.6±2.8 | 21.9±2.5 | 88.7±10.1 | 86.0±9.8  |

We calculated values with both  $dn/dc = 0.185$  (for proteins) and  $dn/dc = 0.147$  (pullulan). When the value varied with  $dn/dc$ , it is reported in the table as the mid-range values  $\pm$  the absolute deviation between the two calculated values.  $M_w$  = the weight-average molecular weight;  $M_w/M_n$  = the dispersity;  $R_h$  = hydrodynamic radius; Fract. Conc. = Concentration of a given molecular weight fraction.

214

215

**Table 2. Estimates of physical parameters of polymers from gel permeation chromatography for liquid fractions from the lower small intestine of MUC2 knockout (MUC2KO) and wild-type (WT) mice**

| Retention volume (mL)              | 11 to 16  |           | 16 to 20 |          | >20      |           |
|------------------------------------|-----------|-----------|----------|----------|----------|-----------|
| Mouse type                         | WT        | MUC2KO    | WT       | MUC2KO   | WT       | MUC2KO    |
| <b>M<sub>w</sub> (kDa)</b>         | 4,730±540 | 5,180±590 | 219±25   | 155±18   | 13.7±1.6 | 5.93±0.68 |
| <b>M<sub>w</sub>/M<sub>n</sub></b> | 1.24      | 1.80      | 1.91     | 1.84     | 1.88     | 2.03      |
| <b>R<sub>h</sub> (nm)</b>          | 57.0      | 49.2      | 8.45     | 7.58     | 1.89     | 1.35      |
| <b>Fract. Conc. (mg/mL)</b>        | 3.42±0.39 | 2.36±0.27 | 23.0±2.6 | 22.8±2.6 | 54.8±6.3 | 63.3±7.2  |

216

217

218

219

220

We calculated values with both  $dn/dc = 0.185$  (for proteins) and  $dn/dc = 0.147$  (pullulan). When the value varied with  $dn/dc$ , it is reported in the table as the mid-range values +/- the absolute deviation between the two calculated values.  $M_w$  = the weight-average molecular weight;  $M_w/M_n$  = the dispersity;  $R_h$  = hydrodynamic radius; Fract. Conc. = Concentration of a given molecular weight fraction.

221  
222

**Table 3. Estimates of physical parameters of polymers from gel permeation chromatography for liquid fractions from the upper small intestine of immunoglobulin-deficient (Rag1KO) and wild-type WT mice.**

| Retention volume (mL)              | 11 to 16  |           | 16 to 20 |          | >20       |           |
|------------------------------------|-----------|-----------|----------|----------|-----------|-----------|
|                                    | WT        | Rag1KO    | WT       | Rag1KO   | WT        | Rag1KO    |
| <b>M<sub>w</sub> (kDa)</b>         | 1,480±170 | 2,140±250 | 108±12   | 74.2±8.5 | 2.84±0.32 | 1.91±0.22 |
| <b>M<sub>w</sub>/M<sub>n</sub></b> | 1.09      | 1.14      | 2.62     | 2.42     | 1.59      | 1.54      |
| <b>R<sub>h</sub> (nm)</b>          | 31.8      | 39.8      | 4.77     | 2.51     | 1.078     | 0.936     |
| <b>Fract. Conc. (mg/mL)</b>        | 1.07±0.12 | 1.13±0.13 | 14.3±1.6 | 13.9±1.6 | 66.1±7.6  | 70.5±8.1  |

223 We calculated values with both  $dn/dc = 0.185$  (for proteins) and  $dn/dc = 0.147$  (pullulan). When the value varied with  
 224  $dn/dc$ , it is reported in the table as the mid-range value +/- the absolute deviation between the two calculated values.  $M_w$  =  
 225 the weight-average molecular weight;  $M_w/M_n$  = the dispersity;  $R_h$  = hydrodynamic radius; Fract. Conc. = Concentration  
 226 of a given molecular weight fraction.  
 227

228  
229

**Table 4. Estimates of physical parameters of polymers from gel permeation chromatography for liquid fractions from the lower small intestine of immunoglobulin-deficient (Rag1KO) and wild-type WT mice.**

| <b>Retention volume (mL)</b>       | <b>11 to 16</b> |           | <b>16 to 20</b> |           | <b>&gt;20</b> |           |
|------------------------------------|-----------------|-----------|-----------------|-----------|---------------|-----------|
| <b>Mouse type</b>                  | WT              | Rag1KO    | WT              | Rag1KO    | WT            | Rag1KO    |
| <b>M<sub>w</sub> (kDa)</b>         | 1,080±120       | 2,490±290 | 66.9±7.7        | 91.6±10.5 | 3.64±0.42     | 3.72±0.43 |
| <b>M<sub>w</sub>/M<sub>n</sub></b> | 1.18            | 1.05      | 1.71            | 1.98      | 2.09          | 1.98      |
| <b>R<sub>h</sub> (nm)</b>          | 34.6            | 47.1      | 4.67            | 4.85      | 1.116         | 1.09      |
| <b>Fract. Conc. (mg/mL)</b>        | 1.52±0.17       | 1.89±0.22 | 15.8±1.8        | 14.1±1.6  | 49.5±5.7      | 55.1±6.3  |

230 We calculated values with both  $dn/dc = 0.185$  (for proteins) and  $dn/dc = 0.147$  (pullulan). When the value varied with  
 231  $dn/dc$ , it is reported in the table as the mid-range values +/- the absolute deviation between the two calculated values.  $M_w$   
 232 = the weight-average molecular weight;  $M_w/M_n$  = the dispersity;  $R_h$  = hydrodynamic radius; Fract. Conc. = Concentration  
 233 of a given molecular weight fraction.  
 234

235  
236

**Table 5: Gel permeation chromatography of Fibersol-2 and pectin in phosphate-buffered saline**

| <b>Sample</b>                      | Fibersol-2 | Pectin |
|------------------------------------|------------|--------|
| <b>M<sub>w</sub> (kDa)</b>         | 3.48       | 232    |
| <b>M<sub>w</sub>/M<sub>n</sub></b> | 10.5       | 1.97   |
| <b>R<sub>h</sub> (nm)</b>          | 1.24       | 25.4   |

237  
238  
239

Both fiber types were analyzed with  $dn/dc = 0.147$  for polysaccharides.  $M_w$  = weight-average molecular weight;  $M_w/M_n$  = the dispersity;  $R_h$  = hydrodynamic radius

240  
241

**Table 6: Estimates of physical parameters of polymers from gel permeation chromatography for liquid fractions from upper small intestine of pectin and Fibersol-2 fed mice**

| Retention volume (mL)              | 11 to 16  |             | 16 to 20  |            | >20       |            |
|------------------------------------|-----------|-------------|-----------|------------|-----------|------------|
|                                    | Pectin    | Fibersol-2  | Pectin    | Fibersol-2 | Pectin    | Fibersol-2 |
| <b>Mouse type</b>                  |           |             |           |            |           |            |
| <b>M<sub>w</sub> (kDa)</b>         | 267±31    | 686±79      | 40.0±4.5  | 35.3±4.0   | 1.39±0.16 | 1.67±0.19  |
| <b>M<sub>w</sub>/M<sub>n</sub></b> | 1.50      | 1.08        | 2.15      | 2.64       | 2.45      | 1.48       |
| <b>R<sub>h</sub> (nm)</b>          | 31.8      | N/C**       | 5.52      | 2.88       | 0.819     | N/C**      |
| <b>Fract. Conc. (mg/mL)</b>        | 1.62±0.19 | 0.516±0.059 | 9.00±1.03 | 23.3±2.7   | 53.7±6.1  | 77.0±8.8   |

242  
243  
244  
245  
246  
247

We calculated values with both  $dn/dc = 0.185$  (for proteins) and  $dn/dc = 0.147$  (pullulan). When the value varied with  $dn/dc$ , it is reported in the table as the mid-range values +/- the absolute deviation between the two calculated values.  $M_w$  = the weight-average molecular weight;  $M_w/M_n$  = the dispersity;  $R_h$  = hydrodynamic radius; Fract. Conc. = Concentration of a given molecular weight fraction. N/C\*\* denotes values for which the concentration was too low to calculate.

248  
249

**Table 7: Estimates of physical parameters of polymers from gel permeation chromatography for liquid fractions from lower small intestine of pectin and Fibersol-2-fed mice**

| Retention<br>volume (mL)           | 11 to 16  |             | 16 to 20 |            | >20       |            |
|------------------------------------|-----------|-------------|----------|------------|-----------|------------|
|                                    | Pectin    | Fibersol-2  | Pectin   | Fibersol-2 | Pectin    | Fibersol-2 |
| <b>Mouse type</b>                  |           |             |          |            |           |            |
| <b>M<sub>w</sub> (kDa)</b>         | 282±32    | 1680±190    | 30.2±3.5 | 18.8±2.2   | 1.12±0.13 | 2.32±0.27  |
| <b>M<sub>w</sub>/M<sub>n</sub></b> | 7.37      | 1.64        | 1.70     | 2.78       | 2.89      | 1.14       |
| <b>R<sub>h</sub> (nm)</b>          | 29.0      | 26.4        | 5.28     | 2.16       | 0.724     | 1.06       |
| <b>Fract. Conc.<br/>(mg/mL)</b>    | 2.48±0.28 | 0.839±0.096 | 9.43±1.1 | 53.6±6.1   | 42.7±4.9  | 88.3±10.1  |

250  
251  
252  
253  
254  
255

We calculated values with both  $dn/dc = 0.185$  (for proteins) and  $dn/dc = 0.147$  (pullulan). When the value varied with  $dn/dc$ , it is reported in the table as the mid-range values +/- the absolute deviation between the two calculated values.  $M_w$  = the weight-average molecular weight;  $M_w/M_n$  = the dispersity;  $R_h$  = hydrodynamic radius; Fract. Conc. = concentration of a given molecular weight fraction.



256  
257

258 **Table 8. Zeta potential and NMR measurements of PEG-coated particles.** For the zeta potential measurements, each  
259 particle solution was 0.1 mg/ml of particles in 1 mM KCl. Measurements were done on a Brookhaven NanoBrook  
260 ZetaPALS Potential Analyzer. Three trials were done where each trial was 10 runs each and each run was 10 cycles.  
261 Values reported are the average zeta potential for the 30 runs. NMR measurements were performed as described in  
262 *Materials and Methods*. Values are estimates of the nanomoles of polyethylene glycol (PEG) per milligrams of particles.  
263 To calculate this, we have to assume all the PEG on the surface is a single MW. It is therefore assumed all the PEG on the  
264 surface is PEG 5 kDa.

| Surface Modification of PS particles | Zeta potential (mV) | Nanomoles PEG/mg particles |
|--------------------------------------|---------------------|----------------------------|
| mPEG 5 kDa                           | -18.87 ± 1.78       | 5.5                        |
| mPEG 5 kDa w/ mPEG 1 kDa backfill    | -7.66 ± 2.12        | 4.6                        |
| mPEG 5 kDa w/ mPEG 350 Da backfill   | -9.99 ± 1.65        | 4.3                        |
| mPEG 5 kDa w/ mPEG 5 kDa backfill    | -14.56 ± 1.78       | 4.0                        |
| mPEG 2 kDa                           | -39.59 ± 2.41       | 9.4                        |
| Carboxylate-coated (no PEG)          | -61.36 ± 12.40      | 0.0                        |

265  
266  
267  
268
